# Supplementary material for: A new fragments allocating method for join query in distributed database
Source: Springer Nature journal article supplement (doi:10.1007/s11704-019-9032-1), 2020-01-03

# A new fragments allocating method for join query in distributed database

**Jintao GAO, Zhanhuai LI, Wenjie LIU,  
Zhijun GUO, Yantao YUE**

Frontiers of Computer Science, DOI: 10.1007/s11704-019-9032-1

# Problems & Ideas

- Problems of fragment allocation in distributed system
  - Not reusing the common allocation for the same fragment
  - High cost to generate local executing places
- Ideas: Allocating fragments based on fragment journal
  - Constructing fragment journal to record allocations for different fragments
  - Asynchronously migrating data to generate local executing places based on fragment journal
- **The architecture of our strategy(AFFJ)**

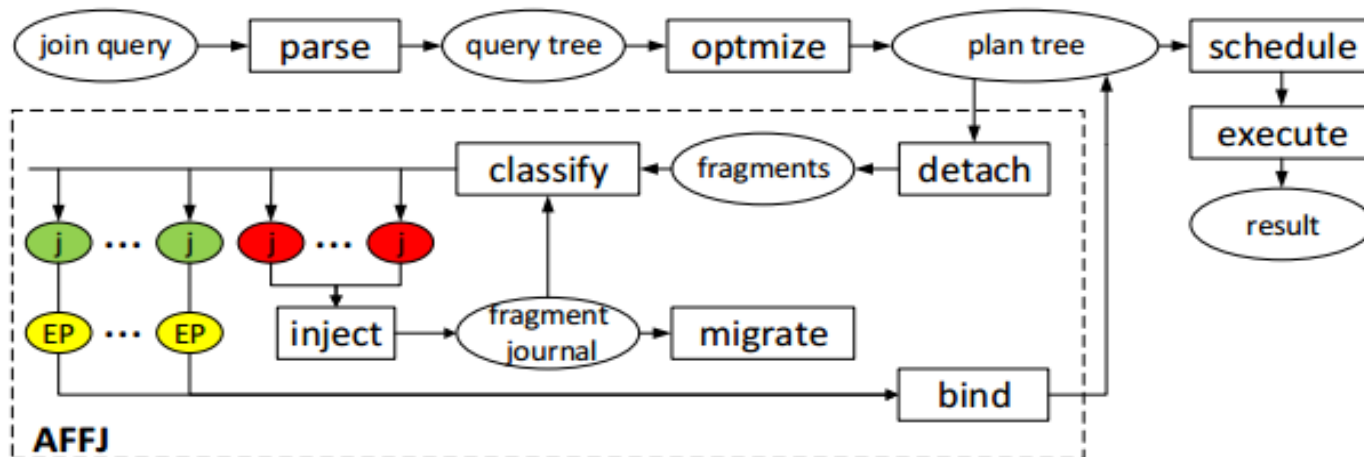

# Main Contributions

- Efficiency of Selecting Local Executing Places

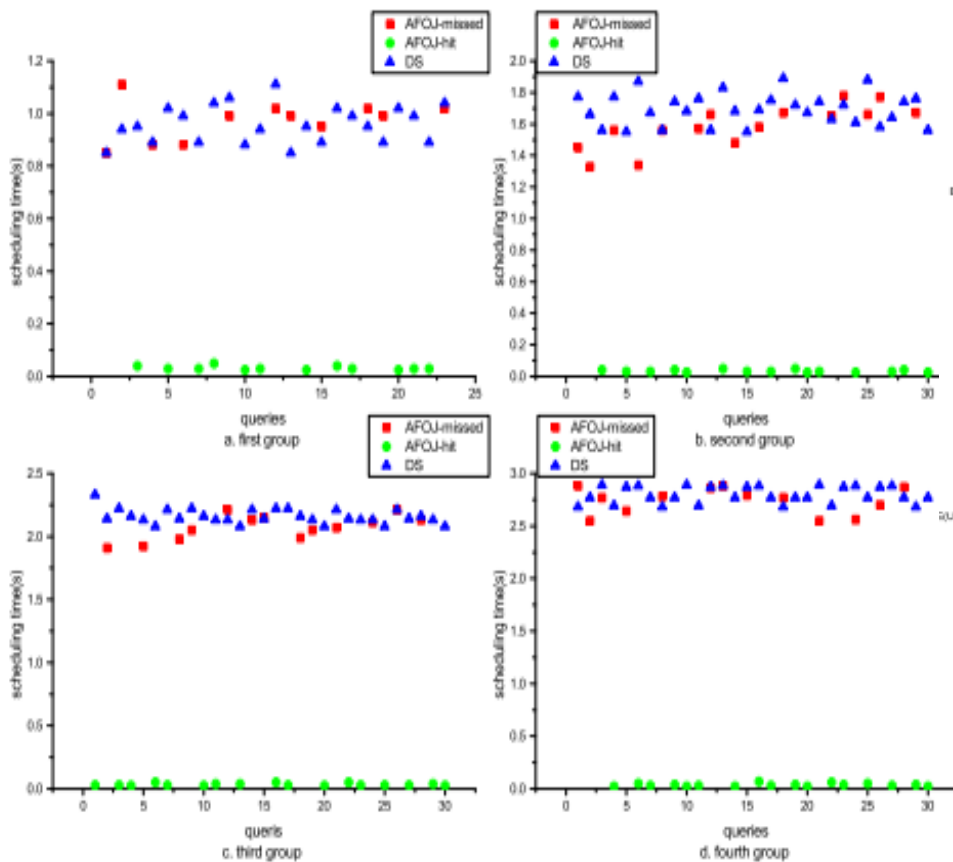

- Effect to System Performance

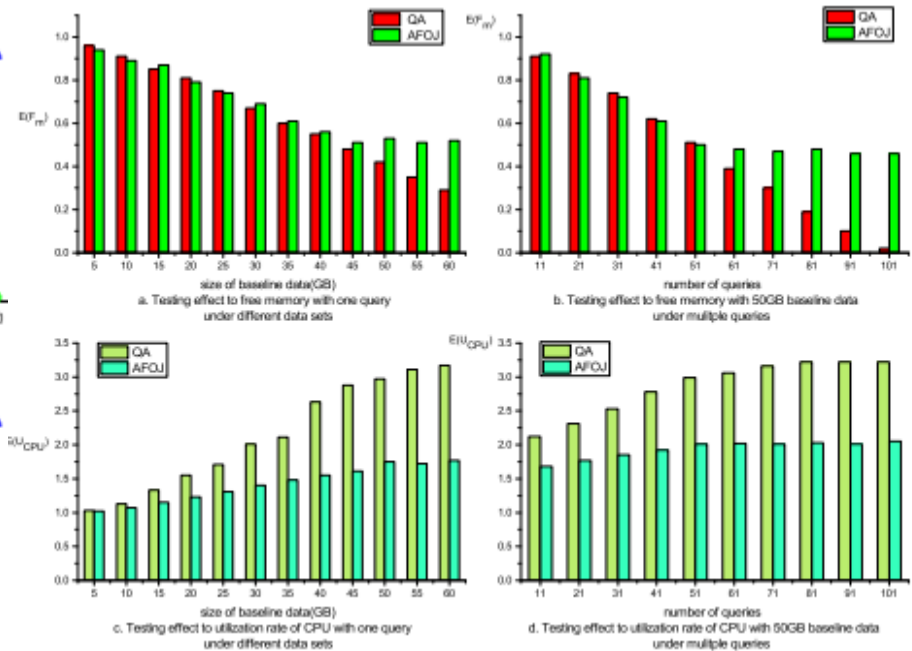

Supplement: 11704_2019_9032_MOESM1_ESM.pdf [file 11704_2019_9032_MOESM1_ESM.pdf]
